# Supplementary material
Source: publisher site journal article supplement (https://www.dovepress.com/get_supplementary_file.php?f=508800.docx)
Supplement: Supplementary file 1 [file get_supplementary_file.php]

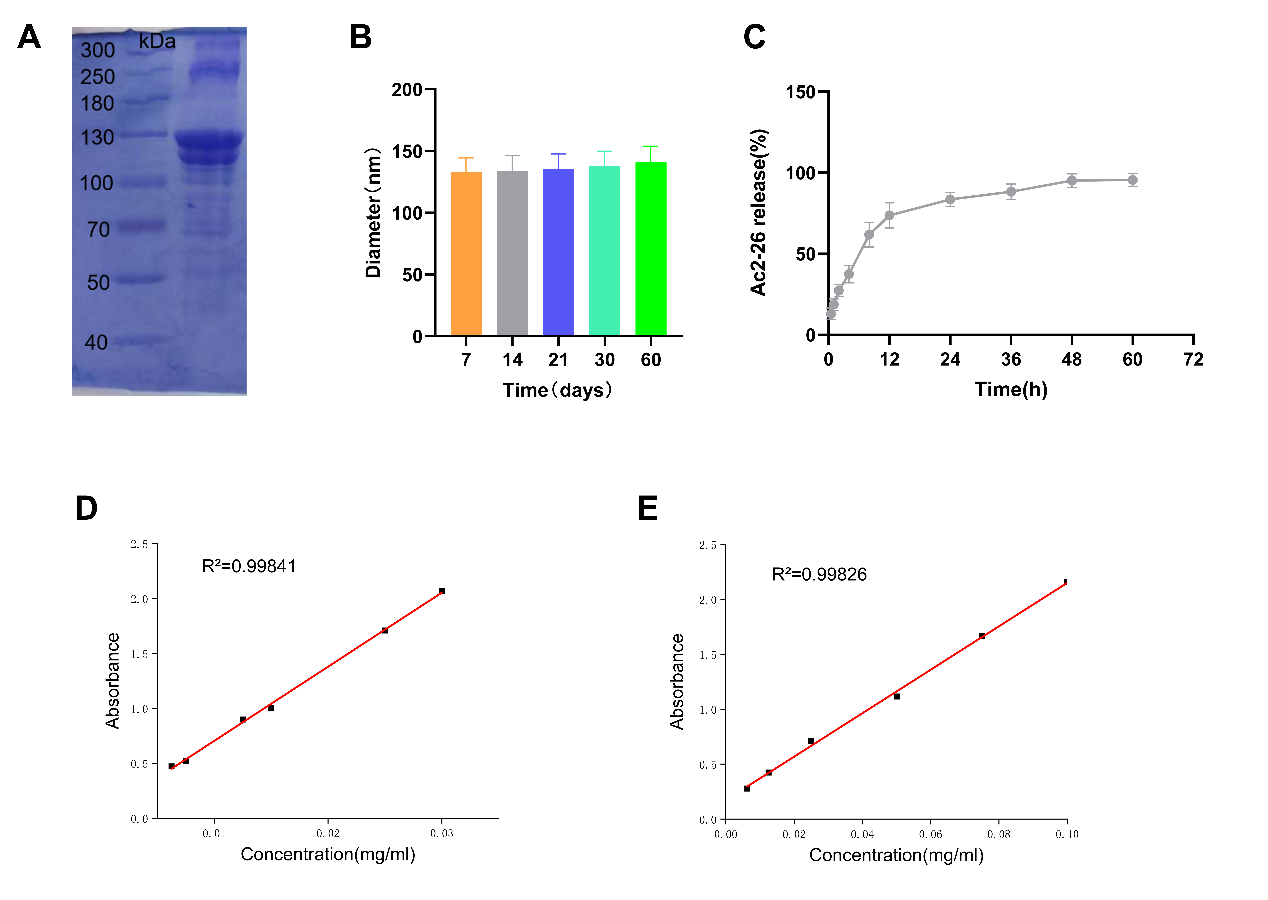


**Supplementary Figure 1 (A)** Sodium dodecyl sulfate-polyacrylamide gel electrophoresis of collagen. **(B)** Changes in particle size of nanoparticles at different times (n=3). **(C)** Free Ac2-26 release curve(n=3). **(D)** Standard curve of Pue. **(E)** Ac2-26 peptide standard curve. Data are expressed as mean ± standard deviation.


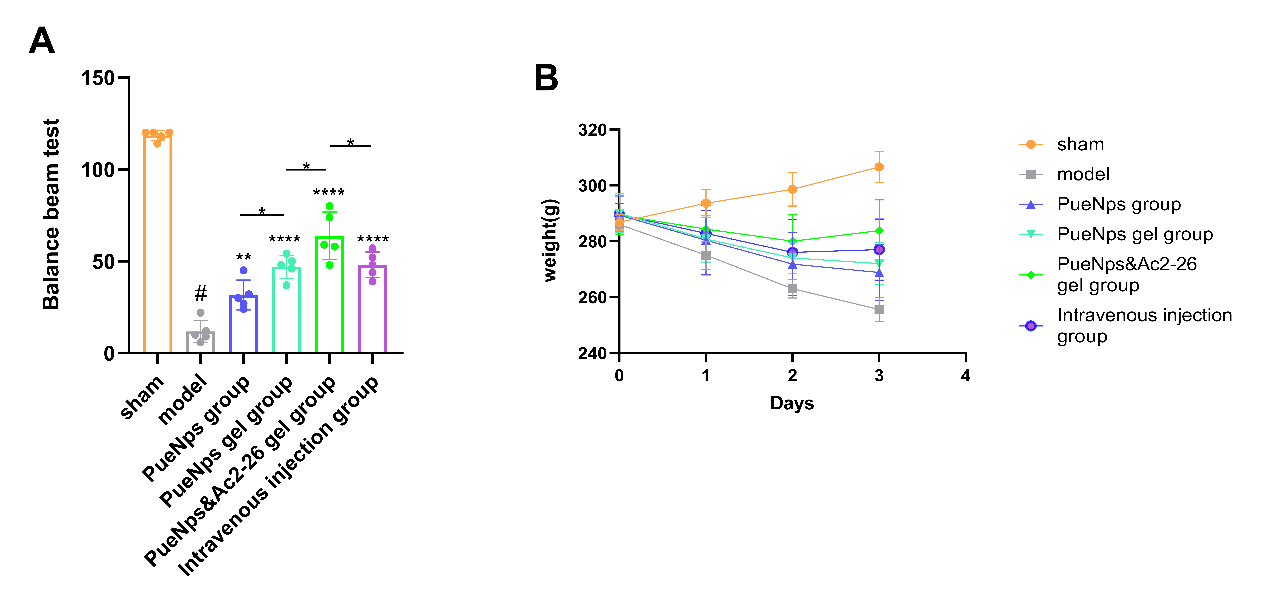


**Supplementary Figure 2 (A)** Balance beam test in rats (n=5). **(B)** Body weight changes in rats (n=5). Data are expressed as mean ± standard deviation. #P < 0.05 for comparison with the sham-operated group, *P for comparison with the model group, *P < 0.05, **P < 0.001, ****P< 0.0001.


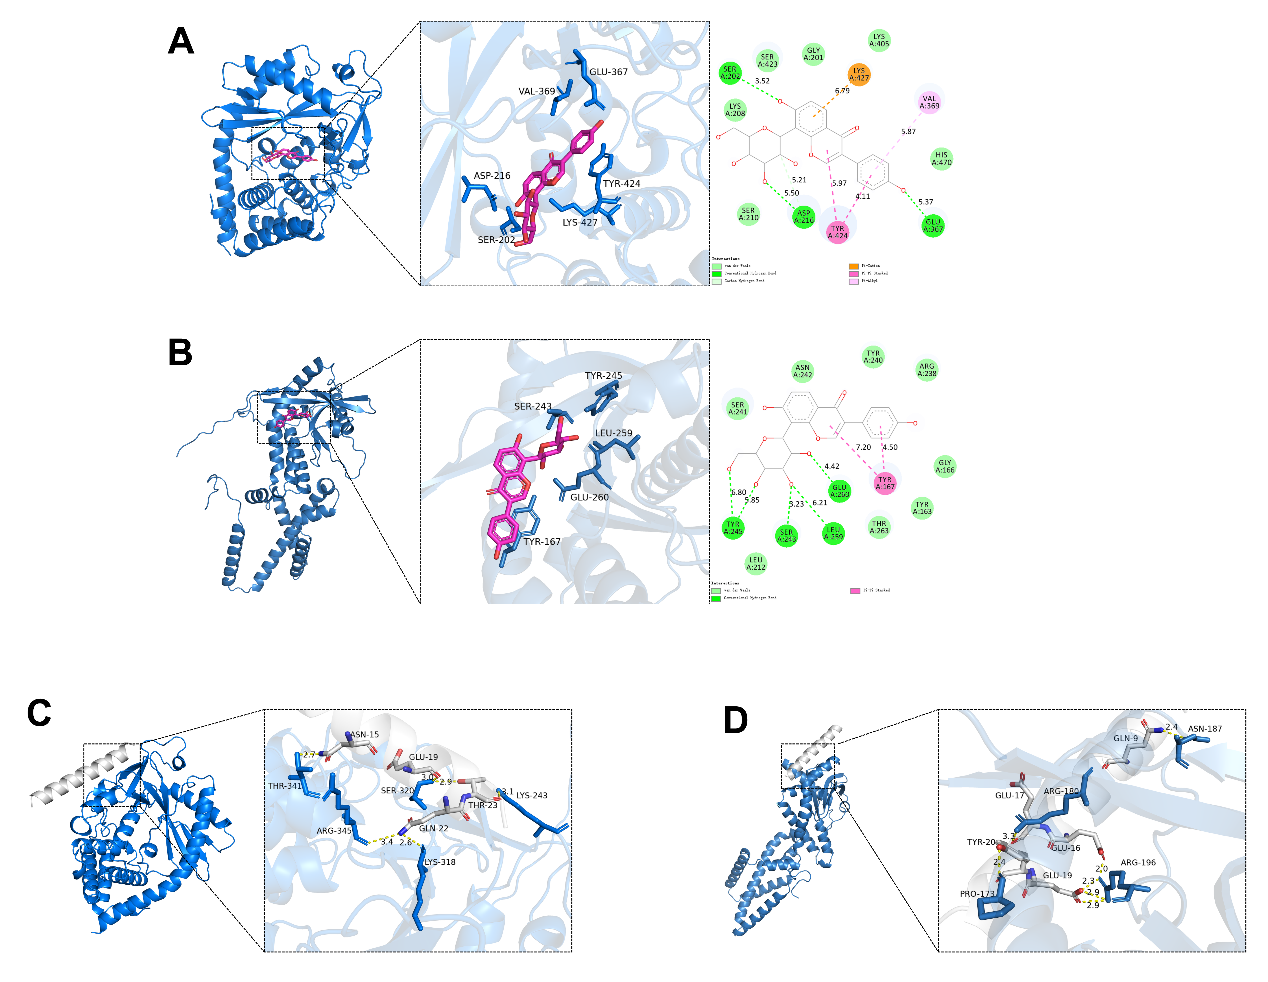


**Supplementary Figure 3** Molecular docking results**. (A)** Schematic diagram of the docking of Pue with cGAS molecule. **(B)** Schematic diagram of the docking of Pue with STING molecule. **(C)** Schematic diagram of Ac2-26 docking with cGAS molecule. **(D)** Schematic diagram of Ac2-26 docking with STING molecule.
